# Supplementary material for: Microwave Roasting as an Alternative to Convection Roasting: Sensory Analysis and Physical Characterization of Dark Chocolate
Source: MDPI journal article supplement (doi:10.3390/foods12040887), 2023-02-19
Supplement: s1 [file s1]

# Supplementary materials

To accompany

## **Microwave Roasting as an Alternative to Convection Roasting: Sensory Analysis and Physical Characterization of Dark Chocolate**

Joachim J. Schouteten<sup>1,\*</sup>, Valérie Lemarcq<sup>2</sup>, Davy Van de Walle<sup>2</sup>, Eleni Sioriki<sup>2</sup> and Koen Dewettinck<sup>2</sup>

<sup>1</sup> Department of Agricultural Economics, Ghent University, Coupure Links 653, Gent 9000, Belgium

<sup>2</sup> Department of Food Technology, Safety and Health, Food Structure & Function Research Group (FSF), Faculty of Bioscience Engineering, Ghent University, Belgium

\* Correspondence: Joachim.Schouteten@ugent.be; Tel.: +3292645945

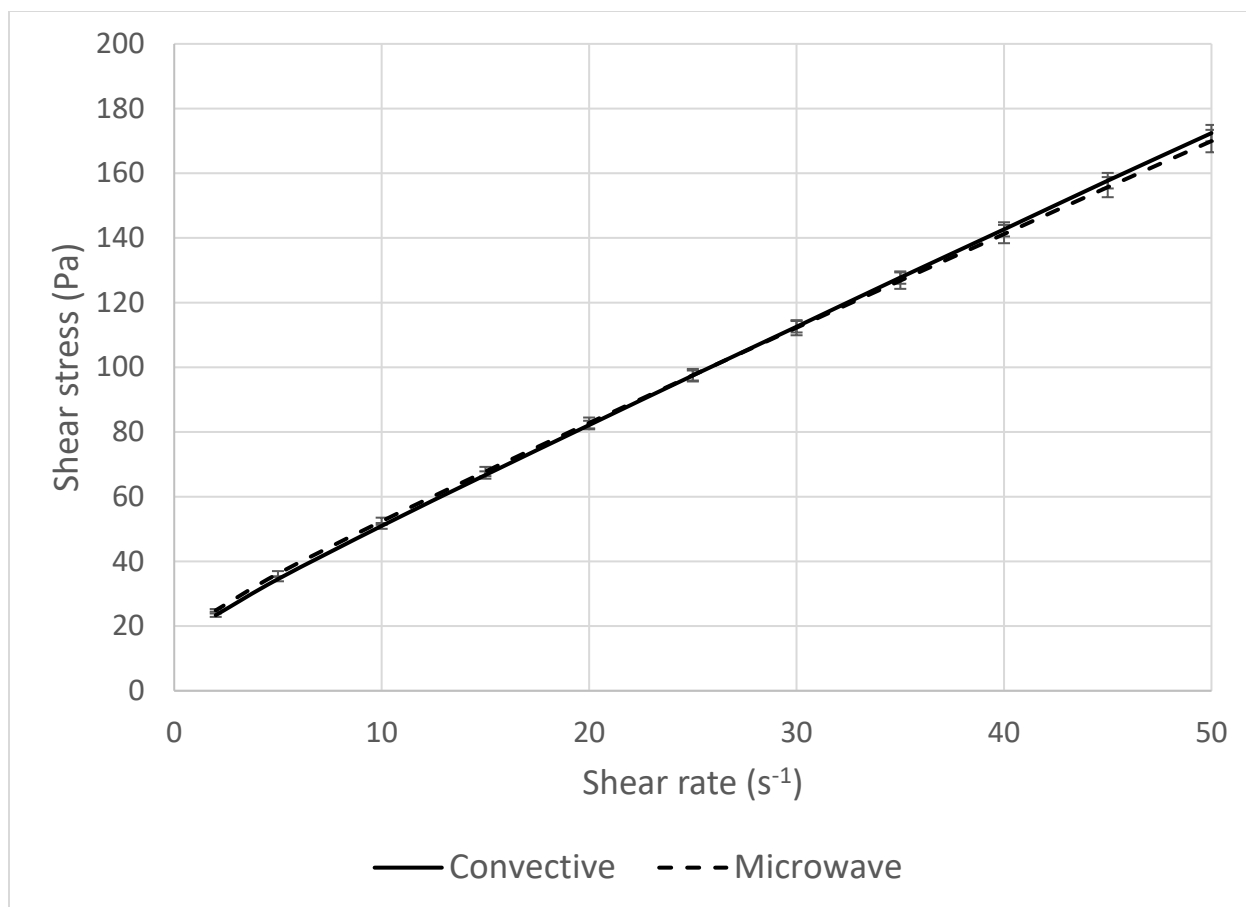

Figure S1. Shear stress in function of increasing shear rates for chocolates produced from convective and microwave roasted cocoa beans ( $n=3$ ).

|                                       | Convection      | Microwave       |
|---------------------------------------|-----------------|-----------------|
| $\sigma_{CA}$ , downward (Pa)         | 6,43 $\pm$ 0,18 | 7,73 $\pm$ 0,13 |
| $\eta_{CA}$ , downward (Pa.s)         | 2200 $\pm$ 23   | 2056 $\pm$ 30   |
| Thixotropy (Pa)                       | 1,20 $\pm$ 0,32 | 1,34 $\pm$ 0,33 |
| $\eta^*$ @ 50 s <sup>-1</sup> (mPa.s) | 3458 $\pm$ 39   | 3400 $\pm$ 49   |

*Table S1. Flow parameters (mean  $\pm$  S.D.) of the chocolates produced from convective and roasted cocoa beans (n=3). No significant differences were found for the different flow parameters ( $p < 0.05$ ).*
